# Supplementary material for: The vaginal microbiome of pregnant women is less rich and diverse, with lower prevalence of Mollicutes, compared to non-pregnant women
Source: PubMed Central journal article supplement (PMC5569030; doi:10.1038/s41598-017-07790-9), 2017-08-23
Supplement: 41598_2017_7790_MOESM1_ESM.pdf [file 41598_2017_7790_MOESM1_ESM.pdf]

## Supplementary information

### **The vaginal microbiome of pregnant women is less rich and diverse, with lower prevalence of Mollicutes, compared to non-pregnant women**

Aline C. Freitas<sup>1</sup>, Bonnie Chaban<sup>1#</sup>, Alan Bocking<sup>2,3^</sup>, Maria Rocco<sup>3</sup>, Siwen Yang<sup>2,3</sup>, Janet E. Hill<sup>1^</sup>, Deborah M. Money<sup>4,5^\*</sup>, and the VOGUE Research Group

#### Supplementary Methods

##### **Comparison between microbiological and demographic characteristics of the pregnant cohort.**

Microbiological and demographic characteristics were compared to CST (I, II, III, IVC, IVD, V), presence of Mollicutes (yes/no) and *Ureaplasma* (yes/no), microbiome richness (continuous variable) and diversity (continuous variable). Each of these five observations were compared to the following metadata: Nugent score category (BV-, intermediate BV, BV+), 16S RNA gene copy number ( $<10^4$ ,  $10^5$ - $10^6$ ,  $10^7$ - $10^8$ ,  $>10^9$ ), maternal age (18-25, 26-35, 36-45), maternal age (18-35, 35-45), BMI category (underweight, normal, overweight, obese), BMI ( $<25$ ,  $\geq 25$ ), ethnicity (White, East Asian, South Asian, Black, Hispanic, Other), ethnicity (White, East Asian, South Asian, Other), ethnicity (White, Asian, Other), natural conception (yes/no), folic acid intake before conception (yes/no), folic acid intake during pregnancy (yes/no), vitamins before

conception (yes/no), vitamins during pregnancy (yes/no), unprotected sex in the past 4 days (yes/no), parity (0-6), parity (0, >1), pre-existing conditions (yes/no), surgeries in the past 10 years (yes/no), smoking (yes/no), drinking alcohol (yes/no), antibiotics at enrolment (yes/no), gestational age at delivery (<37, ≥37), mode of delivery (vaginal, C-section), mode of delivery (vaginal, C-section, C-section-elective), fetal sex (male, female), neonate in level 2 care nursery (yes/no), birth weight (continuous variable) and Apgar score at 5 minutes (0-9).

**Supplementary Table S1 (.xls)**

**Summary of OTU analyzed in this study.** Best database match, percentage of identity, cpnDB name, taxonomic lineage and abundance in each library are shown.
